# Supplementary material for: Two novel QTLs for harvest index contribute to high yield production in rice (Oryza sativa L.)
Source: Research Square preprint supplement (doi:10.21203/rs.3.rs-56282/v2), 2020-12-11
Supplement: Supplementary file 1 [file 7961f7367401a0164a2300a3.docx]

**Table 1**. Sowing date, transplanting date and investigation traits of each cropping season.

**Table 2.** Number of KASP and SSR markers on twelve rice chromosomes.

**Table 3.** The correlations of HI in RILs among four cropping seasons.

| Season | 2016ISG_F | 2017ISG_F | 2018ISG_F | 2017TKB |
| --- | --- | --- | --- | --- |
| 2016ISG_F | − |  |  |  |
| 2017ISG_F | 0.723 *** | − |  |  |
| 2018ISG_F | 0.681 *** | 0.796 *** | − |  |
| 2017TKB | 0.680 *** | 0.486 *** | 0.548 *** | − |

*** represents a significant correlation between the two cropping seasons at *P* < 0.001 level.
